# Supplementary material for: Firewood, smoke and respiratory diseases in developing countries—The neglected role of outdoor cooking
Source: PLOS journal article supplement (doi:10.1371/journal.pone.0178631), 2017-06-28
Supplement: S9 (10.1371/journal.pone.0178631.s009) [file journal.pone.0178631.s009]

Table 7: Estimation of ARI in rural areas with coefficients and marginal effects with vaccination and frequency of smoking as further control variables

|                                 | <b>ARI</b><br>Children<br>0-4 years | <b>ARI</b><br>Children<br>0-4 years<br>margins | <b>ARI</b><br>Children<br>0-1 years | <b>ARI</b><br>Children<br>0-1 years<br>margins | <b>ARI</b><br>Children<br>0-4 years                | <b>ARI</b><br>Children<br>0-4 years<br>margins | <b>ARI</b><br>Children<br>0-1 years | <b>ARI</b><br>Children<br>0-1 years<br>margins |
|---------------------------------|-------------------------------------|------------------------------------------------|-------------------------------------|------------------------------------------------|----------------------------------------------------|------------------------------------------------|-------------------------------------|------------------------------------------------|
|                                 | <b>Regular smoking in the house</b> |                                                |                                     |                                                | <b>Child has received at least one vaccination</b> |                                                |                                     |                                                |
| Outdoor cooking                 | -0.083***<br>(0.01)                 | -0.009***<br>(0.00)                            | -0.126***<br>(0.02)                 | -0.016***<br>(0.00)                            | -0.031**<br>(0.01)                                 | -0.004**<br>(0.00)                             | -0.051**<br>(0.02)                  | -0.007**<br>(0.00)                             |
| Observations                    | 122,380                             | 122,380                                        | 50,313                              | 50,313                                         | 111,945                                            | 111,945                                        | 38,012                              | 38,012                                         |
| Country dummies                 | Yes                                 | Yes                                            | Yes                                 | Yes                                            | Yes                                                | Yes                                            | Yes                                 | Yes                                            |
| Year of data collection dummies | Yes                                 | Yes                                            | Yes                                 | Yes                                            | Yes                                                | Yes                                            | Yes                                 | Yes                                            |
| Interview in rainy season dummy | Yes                                 | Yes                                            | Yes                                 | Yes                                            | Yes                                                | Yes                                            | Yes                                 | Yes                                            |
| Household characteristics       | No                                  | No                                             | Yes                                 | Yes                                            | No                                                 | No                                             | Yes                                 | Yes                                            |
| Regular smoking in house        | Yes                                 | Yes                                            | Yes                                 | Yes                                            | No                                                 | No                                             | No                                  | No                                             |
| Vaccination                     | No                                  | No                                             | No                                  | No                                             | Yes                                                | Yes                                            | Yes                                 | Yes                                            |

*Note:* \*, \*\*, \*\*\* indicate p-values of a 10 percent level, 5 percent level and 1 percent level, respectively. All estimations are clustered on the household level and standard errors are in brackets.

*Source:* DHS all country dataset from 2005–2014.
